# Supplementary material for: Metformin Alters Locomotor and Cognitive Function and Brain Metabolism in Normoglycemic Mice
Source: PubMed Central journal article supplement (PMC6764722; doi:10.14336/ad.2019.0120), 2019-10-01
Supplement: AD-10-5-949-s.pdf [file AD-10-5-949-s.pdf]

## SUPPLEMENTARY DATA

# **Metformin Alters Locomotor and Cognitive Function and Brain Metabolism in Normoglycemic Mice**

**Wenjun Li<sup>1,#</sup>, Kiran Chaudhari<sup>1,#</sup>, Ritu Shetty<sup>1</sup>, Ali Winters<sup>1</sup>, Xiaofei Gao<sup>2</sup>, Zeping Hu<sup>2</sup>, Woo-Ping Ge<sup>2,3</sup>, Nathalie Sumien<sup>1</sup>, Michael Forster<sup>1</sup>, Ran Liu<sup>1</sup>, Shao-Hua Yang<sup>1,\*</sup>**

<sup>1</sup>Department of Pharmacology and Neuroscience University of North Texas Health Science Centre, Fort Worth, TX76107, USA.

<sup>2</sup>Children's Research Institute, Department of Paediatrics, University of Texas, Southwestern Medical Center, Dallas, TX 75390, USA

<sup>3</sup>Department of Neuroscience, Department of Neurology & Neurotherapeutics, University of Texas, Southwestern Medical Center, Dallas, TX 75390, USA

# SUPPLEMENTARY DATA

**Supplementary Table 1.** Impact of metformin treatment on metabolic profile at the hippocampus of normoglycemic mice.

| Sample Name                   | Hippo-ctrl<br>AVERAGE | hippo-metformin<br>AVERAGE | Drug/ctrl<br>H | Ctrl/drug<br>H | t-test<br>t-test |
|-------------------------------|-----------------------|----------------------------|----------------|----------------|------------------|
| spermine                      | 1.64E-04              | 3.54E-04                   | 2.156131022    | 0.463793707    | 0.227466634      |
| phosphoenol-pyruvic acid      | 1.29E-03              | 1.82E-03                   | 1.414367893    | 0.707029624    | 0.05931152       |
| 2,3-diphospho-D-glyceric acid | 3.47E-04              | 4.87E-04                   | 1.403402461    | 0.712553974    | 0.165901818      |
| spermidine                    | 4.53E-04              | 6.30E-04                   | 1.39127516     | 0.718765079    | 0.42377625       |
| propionylcholine              | 8.59E-03              | 1.14E-02                   | 1.325685781    | 0.754326564    | 0.663678307      |
| 2-deoxycytidine               | 3.27E-05              | 4.28E-05                   | 1.310998608    | 0.762777317    | 0.174797133      |
| homoserine                    | 3.91E-03              | 5.10E-03                   | 1.303170197    | 0.767359476    | 0.171362532      |
| histidine                     | 3.21E-03              | 4.16E-03                   | 1.297328184    | 0.770814981    | 0.046713114      |
| carnitine.C8                  | 2.70E-04              | 3.50E-04                   | 1.296163702    | 0.771507487    | 0.358895248      |
| 2-P-glycerate                 | 3.90E-03              | 5.02E-03                   | 1.285767523    | 0.777745574    | 0.113463694      |
| dimethylglycine               | 2.32E-03              | 2.98E-03                   | 1.284976986    | 0.778224055    | 0.030372444      |
| cadaverine                    | 6.26E-05              | 7.87E-05                   | 1.258063851    | 0.794872215    | 0.205386055      |
| carnitine.C12                 | 5.08E-05              | 6.33E-05                   | 1.24653682     | 0.802222593    | 0.593773593      |
| 1-methyl-nicotinamide         | 2.07E-04              | 2.58E-04                   | 1.245362098    | 0.802979312    | 0.414322086      |
| GSSG                          | 1.44E-04              | 1.77E-04                   | 1.234196643    | 0.810243656    | 0.184868561      |
| sn-glycero3-phosphate         | 1.36E-03              | 1.68E-03                   | 1.230306282    | 0.812805734    | 0.379801987      |
| carnitine.C6                  | 6.06E-04              | 7.45E-04                   | 1.228674227    | 0.813885388    | 0.236566121      |
| fructose-1,6-biphosphate      | 2.40E-02              | 2.93E-02                   | 1.221161656    | 0.818892401    | 0.199140532      |
| xanthosine 5-monophosphate    | 3.64E-04              | 4.41E-04                   | 1.210971105    | 0.825783535    | 0.15436797       |
| galactose 1-phosphate         | 1.28E-03              | 1.53E-03                   | 1.202096114    | 0.831880237    | 0.166287212      |
| glutamine                     | 8.94E-03              | 1.07E-02                   | 1.19921344     | 0.833879914    | 0.107952894      |
| UMP                           | 1.71E-03              | 2.05E-03                   | 1.198907134    | 0.83409296     | 0.109751771      |
| UDP.glucuronic acid           | 3.74E-05              | 4.48E-05                   | 1.197255155    | 0.835243845    | 0.400027598      |
| adenosine 5-diphosphoribose   | 7.93E-03              | 9.47E-03                   | 1.193659543    | 0.837759817    | 0.056400622      |
| VitaminB-3                    | 4.46E-03              | 5.31E-03                   | 1.192064859    | 0.838880529    | 0.287868072      |
| choline                       | 1.66E-02              | 1.95E-02                   | 1.171653038    | 0.853494992    | 0.032699342      |
| GMP                           | 1.19E-03              | 1.39E-03                   | 1.171505465    | 0.853602505    | 0.238788231      |
| cystathionine                 | 1.90E-04              | 2.22E-04                   | 1.166146502    | 0.857525189    | 0.532551007      |
| inosine                       | 3.23E-04              | 3.76E-04                   | 1.161847007    | 0.860698521    | 0.718579325      |
| uridine                       | 1.52E-03              | 1.76E-03                   | 1.159268529    | 0.862612911    | 0.5437162        |
| cytidine                      | 1.76E-02              | 2.04E-02                   | 1.157802685    | 0.863705028    | 0.490575505      |
| guanine                       | 7.78E-04              | 8.96E-04                   | 1.151412221    | 0.868498685    | 0.377757066      |
| carnitine.C5                  | 9.13E-04              | 1.05E-03                   | 1.14733313     | 0.871586442    | 0.598181246      |
| carnitine.C4                  | 9.31E-04              | 1.06E-03                   | 1.140125425    | 0.877096483    | 0.682059284      |
| IMP                           | 1.24E-03              | 1.41E-03                   | 1.139375367    | 0.877673881    | 0.248928919      |
| CMP                           | 7.47E-03              | 8.46E-03                   | 1.132854462    | 0.882725922    | 0.252674166      |

# SUPPLEMENTARY DATA

|                                    |          |          |             |             |             |
|------------------------------------|----------|----------|-------------|-------------|-------------|
| allantoin                          | 3.70E-05 | 4.19E-05 | 1.132052371 | 0.883351359 | 0.675381979 |
| pipecolic acid                     | 8.71E-03 | 9.84E-03 | 1.129627091 | 0.885247891 | 0.134112973 |
| lysine                             | 1.10E-02 | 1.24E-02 | 1.129140972 | 0.885629009 | 0.340882189 |
| ribose 5-phosphate                 | 9.15E-04 | 1.03E-03 | 1.12776423  | 0.886710159 | 0.549024532 |
| taurine                            | 8.72E-02 | 9.84E-02 | 1.127756042 | 0.886716597 | 0.07760147  |
| methionine sulfoxide               | 2.11E-04 | 2.37E-04 | 1.121762764 | 0.891454086 | 0.621462357 |
| phenyl-lactic acid                 | 1.85E-04 | 2.07E-04 | 1.118533507 | 0.894027755 | 0.330326977 |
| nicotinamide                       | 1.29E-02 | 1.43E-02 | 1.105430316 | 0.904625091 | 0.484427056 |
| G6P-F6P                            | 2.08E-03 | 2.30E-03 | 1.104738946 | 0.905191225 | 0.545885659 |
| thiamine                           | 2.55E-04 | 2.81E-04 | 1.104711142 | 0.905214007 | 0.421431207 |
| betaine                            | 3.89E-03 | 4.25E-03 | 1.092362679 | 0.915446874 | 0.576153862 |
| S.methyl.5.thioadenosine           | 3.77E-03 | 4.11E-03 | 1.090285082 | 0.917191308 | 0.592953794 |
| tetrahydrobiopterin                | 5.86E-05 | 6.37E-05 | 1.087976746 | 0.919137292 | 0.338359598 |
| asparagine                         | 2.88E-03 | 3.13E-03 | 1.085919857 | 0.92087827  | 0.375501641 |
| hypoxanthine                       | 2.62E-03 | 2.85E-03 | 1.083992396 | 0.922515696 | 0.823787896 |
| uracil                             | 1.10E-04 | 1.19E-04 | 1.082418558 | 0.923857035 | 0.833791738 |
| 7.methylguanosine                  | 4.13E-05 | 4.47E-05 | 1.081110893 | 0.924974493 | 0.584644107 |
| N-acetyl-D-glucosamine 1-phosphate | 3.76E-04 | 4.04E-04 | 1.076644435 | 0.928811748 | 0.821586839 |
| 1-methyl-histidine                 | 9.16E-04 | 9.85E-04 | 1.07517951  | 0.930077248 | 0.709923813 |
| carnitine                          | 1.72E-02 | 1.83E-02 | 1.066133508 | 0.937968831 | 0.495311279 |
| adenosine                          | 6.07E-03 | 6.45E-03 | 1.061681017 | 0.941902496 | 0.878782246 |
| acetyllysine                       | 2.53E-03 | 2.69E-03 | 1.061644224 | 0.941935139 | 0.676750659 |
| carnitine.C3                       | 2.95E-03 | 3.13E-03 | 1.061343401 | 0.942202118 | 0.87208868  |
| 5-aminolevulinic acid              | 2.54E-02 | 2.69E-02 | 1.059636012 | 0.943720286 | 0.475058271 |
| ornithine                          | 1.09E-04 | 1.16E-04 | 1.058361534 | 0.944856713 | 0.79980025  |
| AMP                                | 3.87E-02 | 4.07E-02 | 1.050312824 | 0.952097296 | 0.432214187 |
| xanthine                           | 4.76E-04 | 4.98E-04 | 1.044976081 | 0.956959703 | 0.852547158 |
| indole                             | 3.99E-03 | 4.14E-03 | 1.039263538 | 0.962219844 | 0.770465212 |
| glyoxylate                         | 4.20E-04 | 4.36E-04 | 1.037452839 | 0.963899237 | 0.515512348 |
| sedoheptulose-7-phosphate          | 1.80E-04 | 1.87E-04 | 1.037127387 | 0.96420171  | 0.854082869 |
| ascorbic acid                      | 7.92E-02 | 8.20E-02 | 1.034929442 | 0.966249446 | 0.630654744 |
| phosphorylcholine                  | 9.73E-04 | 1.01E-03 | 1.033722072 | 0.967378009 | 0.673595383 |
| SDMA.ADMA                          | 9.87E-05 | 1.02E-04 | 1.029396682 | 0.971442804 | 0.862333149 |
| 1-methyl-adenosine                 | 4.33E-03 | 4.45E-03 | 1.028338173 | 0.972442749 | 0.847063439 |
| N-acetyl-alanine                   | 2.79E-02 | 2.87E-02 | 1.027739448 | 0.97300926  | 0.314168055 |
| S.adenosyl.methionine              | 4.42E-03 | 4.55E-03 | 1.027701851 | 0.973044856 | 0.701620695 |
| N.acetyl.aspartic acid             | 4.22E-03 | 4.32E-03 | 1.025243396 | 0.975378144 | 0.648846351 |
| glutamate                          | 2.80E-03 | 2.87E-03 | 1.024485944 | 0.976099287 | 0.479058575 |
| citrulline                         | 6.83E-04 | 6.98E-04 | 1.023247628 | 0.977280545 | 0.865912743 |
| acetyl.carnitine                   | 1.45E-03 | 1.48E-03 | 1.023057876 | 0.977461807 | 0.636058203 |
| carbamoylphosphate                 | 6.88E-04 | 7.04E-04 | 1.022451148 | 0.978041838 | 0.798595663 |
| succinate                          | 9.84E-03 | 1.00E-02 | 1.018232016 | 0.982094439 | 0.909599721 |

# SUPPLEMENTARY DATA

|                           |          |          |             |             |             |
|---------------------------|----------|----------|-------------|-------------|-------------|
| glycine                   | 2.88E-04 | 2.92E-04 | 1.014415978 | 0.985788889 | 0.951679438 |
| homocysteine              | 1.96E-04 | 1.99E-04 | 1.012611636 | 0.987545436 | 0.88521244  |
| S-adenosyl-homocysteine   | 1.76E-04 | 1.78E-04 | 1.012364906 | 0.987786117 | 0.939739388 |
| cADP-ribose               | 1.17E-02 | 1.18E-02 | 1.007705194 | 0.992353722 | 0.880341028 |
| a-ketoisovaleric acid     | 3.45E-03 | 3.47E-03 | 1.005128531 | 0.994897637 | 0.947429541 |
| y.aminobutyric acid       | 1.18E-03 | 1.18E-03 | 1.004349716 | 0.995669122 | 0.972762242 |
| orotate                   | 2.84E-04 | 2.84E-04 | 1.000091375 | 0.999908634 | 0.998904452 |
| 2-isopropylmalic acid     | 9.96E-02 | 9.86E-02 | 0.990143301 | 1.009954821 | 0.853527761 |
| NADP                      | 1.15E-03 | 1.13E-03 | 0.984389868 | 1.015857672 | 0.923542439 |
| putrescine                | 3.02E-03 | 2.97E-03 | 0.984354648 | 1.015894019 | 0.915652083 |
| pyroglutamic acid         | 7.64E-05 | 7.51E-05 | 0.982475517 | 1.017837068 | 0.796202425 |
| proline                   | 1.27E-02 | 1.23E-02 | 0.971457766 | 1.029380829 | 0.702285449 |
| alanine                   | 1.80E-03 | 1.74E-03 | 0.970996072 | 1.029870284 | 0.867016577 |
| isoleucine                | 7.97E-04 | 7.73E-04 | 0.97089319  | 1.029979415 | 0.837949479 |
| creatine                  | 5.24E-02 | 5.05E-02 | 0.964792742 | 1.036492043 | 0.79347777  |
| urea                      | 1.24E-02 | 1.20E-02 | 0.963522683 | 1.037858286 | 0.674756541 |
| pantothenic acid          | 7.45E-04 | 7.17E-04 | 0.963512614 | 1.037869132 | 0.734672276 |
| methionine                | 8.47E-03 | 8.14E-03 | 0.960583284 | 1.041034147 | 0.758657738 |
| fumarate                  | 1.68E-03 | 1.61E-03 | 0.959586569 | 1.042115461 | 0.619648448 |
| aspartate                 | 9.94E-04 | 9.53E-04 | 0.959220107 | 1.042513593 | 0.762873879 |
| serine                    | 5.60E-03 | 5.36E-03 | 0.957685001 | 1.044184673 | 0.637645343 |
| S.lactoylglutathione      | 3.52E-03 | 3.36E-03 | 0.956634241 | 1.045331598 | 0.93143645  |
| creatinine                | 8.35E-04 | 7.97E-04 | 0.954192948 | 1.048006069 | 0.853949113 |
| glucosamine               | 1.06E-03 | 1.01E-03 | 0.952356177 | 1.050027316 | 0.588168996 |
| aminoadipic acid          | 1.29E-03 | 1.22E-03 | 0.95147306  | 1.051001906 | 0.825179848 |
| pyruvate                  | 1.86E-04 | 1.76E-04 | 0.949378729 | 1.053320418 | 0.524453013 |
| arginine                  | 2.02E-03 | 1.91E-03 | 0.948482861 | 1.054315308 | 0.6574485   |
| aconitate                 | 5.36E-04 | 5.07E-04 | 0.946532651 | 1.05648759  | 0.806214466 |
| riboflavin                | 4.24E-05 | 4.01E-05 | 0.94543205  | 1.057717474 | 0.893250684 |
| valine                    | 3.69E-03 | 3.49E-03 | 0.944938107 | 1.05827037  | 0.492228661 |
| trimethyllysine           | 3.22E-03 | 3.03E-03 | 0.942006646 | 1.061563636 | 0.444836335 |
| betaine aldehyde          | 5.66E-05 | 5.33E-05 | 0.941808003 | 1.061787537 | 0.776436318 |
| O.acetyl.serine           | 6.92E-04 | 6.51E-04 | 0.94037126  | 1.063409786 | 0.504260303 |
| methyl-glyoxal            | 4.32E-04 | 4.02E-04 | 0.930564461 | 1.074616581 | 0.277584202 |
| 2,3-dihydroxybenzoic acid | 2.29E-03 | 2.13E-03 | 0.928898747 | 1.076543598 | 0.435160493 |
| GSH                       | 2.43E-03 | 2.26E-03 | 0.928376073 | 1.077149691 | 0.660672765 |
| guanosine                 | 1.38E-02 | 1.28E-02 | 0.923372617 | 1.082986415 | 0.868169793 |
| hydroxyglutaric acid      | 3.40E-03 | 3.14E-03 | 0.922814475 | 1.083641433 | 0.378763825 |
| gluconic acid             | 3.85E-04 | 3.54E-04 | 0.921196549 | 1.085544666 | 0.729432972 |
| N-acetyl-ornithine        | 4.64E-04 | 4.27E-04 | 0.920887119 | 1.085909423 | 0.721548037 |
| citrate-isocitrate        | 8.47E-02 | 7.79E-02 | 0.919700808 | 1.087310124 | 0.44640158  |
| glucose-fructose          | 1.63E-02 | 1.49E-02 | 0.914847752 | 1.093078054 | 0.651051329 |
| hydroxy.proline           | 1.10E-03 | 1.00E-03 | 0.911917343 | 1.096590616 | 0.464599073 |

## SUPPLEMENTARY DATA

|                            |            |            |             |             |             |
|----------------------------|------------|------------|-------------|-------------|-------------|
| ADP                        | 4.91E-02   | 4.45E-02   | 0.906544549 | 1.10308975  | 0.634229787 |
| lactate                    | 6.34E-04   | 5.73E-04   | 0.903788461 | 1.106453604 | 0.618008838 |
| shikimic acid              | 5.88E-03   | 5.30E-03   | 0.899882871 | 1.111255733 | 0.608706737 |
| glycerophosphorylcholine   | 2.83E-03   | 2.54E-03   | 0.894806104 | 1.117560548 | 0.253696841 |
| dAMP                       | 4.08E-03   | 3.64E-03   | 0.891577666 | 1.121607279 | 0.19808559  |
| homocysteic acid           | 7.15E-05   | 6.32E-05   | 0.883401314 | 1.131988355 | 0.647352234 |
| phenyl.alanine             | 1.17E-02   | 1.03E-02   | 0.881284476 | 1.134707381 | 0.273606015 |
| glucarate                  | 8.93E-05   | 7.86E-05   | 0.880215873 | 1.136084944 | 0.492522028 |
| nicotinate                 | 1.08E-04   | 9.20E-05   | 0.852685716 | 1.172765043 | 0.05252836  |
| glucosamine.6.phosphate    | 5.27E-04   | 4.42E-04   | 0.838816758 | 1.192155486 | 0.487693865 |
| xanthosine                 | 1.00E-04   | 8.40E-05   | 0.838283353 | 1.192914063 | 0.622751867 |
| guanidoacetic acid         | 5.90E-03   | 4.94E-03   | 0.837579831 | 1.193916046 | 0.124890467 |
| NAD                        | 1.44E-04   | 1.20E-04   | 0.832261648 | 1.201545214 | 0.181423065 |
| tyrosine                   | 1.18E-02   | 9.59E-03   | 0.811611104 | 1.232117199 | 0.200815982 |
| 3-hydroxybutyrate          | 2.60E-04   | 2.10E-04   | 0.809072995 | 1.235982423 | 0.537940353 |
| p-hydroxybenzoate          | 1.80E-04   | 1.45E-04   | 0.802373585 | 1.246302244 | 0.136377813 |
| malic acid                 | 3.14E-04   | 2.48E-04   | 0.791870128 | 1.262833342 | 0.001966833 |
| myo.inositol               | 1.26E-03   | 9.91E-04   | 0.784111325 | 1.275329111 | 0.021829578 |
| adenine                    | 1.35E-03   | 1.05E-03   | 0.77282628  | 1.293951857 | 0.226398704 |
| phospho-creatine           | 8.12E-04   | 6.27E-04   | 0.77208261  | 1.295198192 | 0.627345915 |
| acetyl.choline             | 2.33E-02   | 1.76E-02   | 0.756005139 | 1.322742332 | 0.07965308  |
| pyridoxamine               | 5.90E-04   | 4.44E-04   | 0.752298702 | 1.32925924  | 0.500777142 |
| malonate                   | 1.77E-04   | 1.32E-04   | 0.744682482 | 1.342854202 | 0.074219589 |
| dihydroxyacetone-phosphate | 5.63E-04   | 3.79E-04   | 0.672859593 | 1.486194164 | 0.020590639 |
| thymidine                  | 1.81E-04   | 9.97E-05   | 0.550375844 | 1.816940208 | 0.070424801 |
| Sample Name                | Hippo-ctrl | hippo-drug | Drug/ctrl   | Ctrl/drug   | t-test      |
